# Supplementary material
Source: MDPI journal article supplement (https://www.mdpi.com/2571-9408/4/3/85)
Supplement: s1 [file s1]

### Location of some maize stem sculptures registered in Mexico

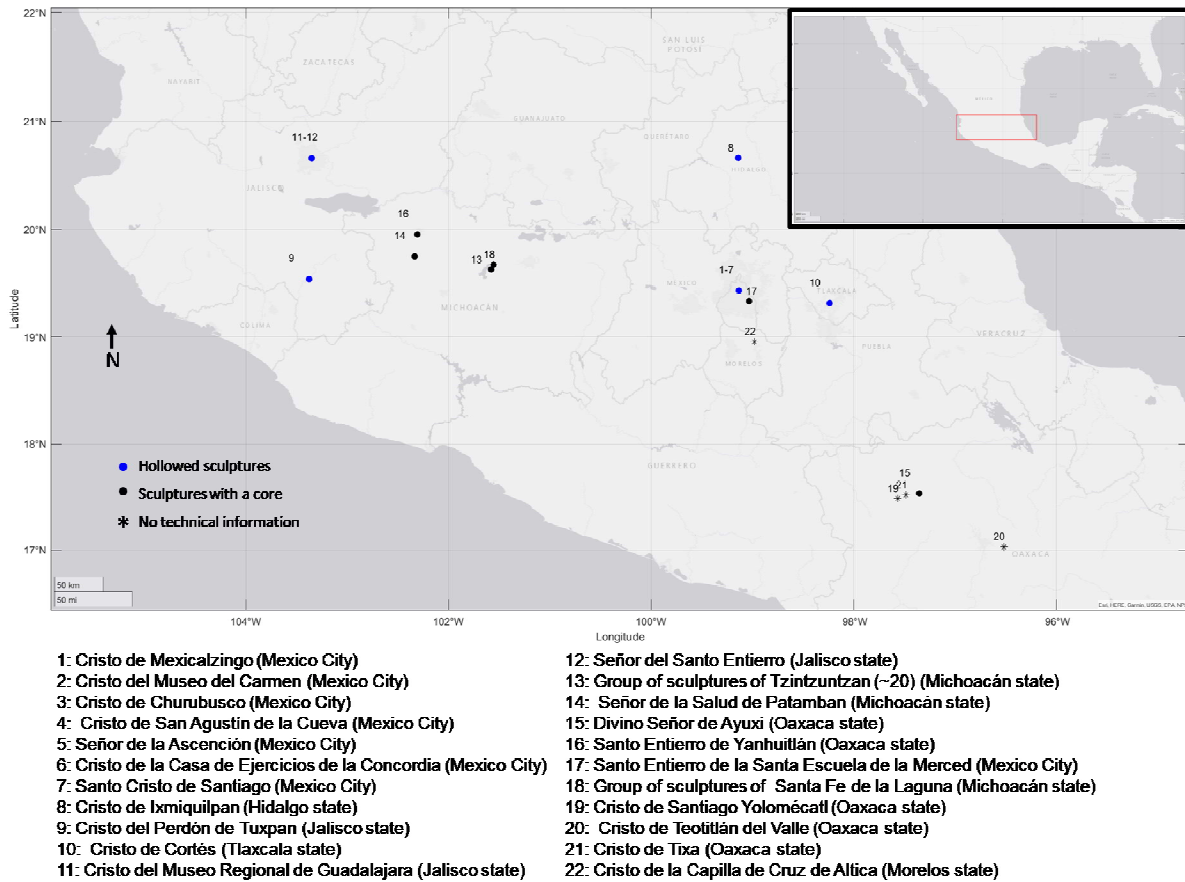

**Figure S1.** Map of Mexico showing the current location and the technical type of structure of maize stem sculptures reported in literature or registered by the authors.

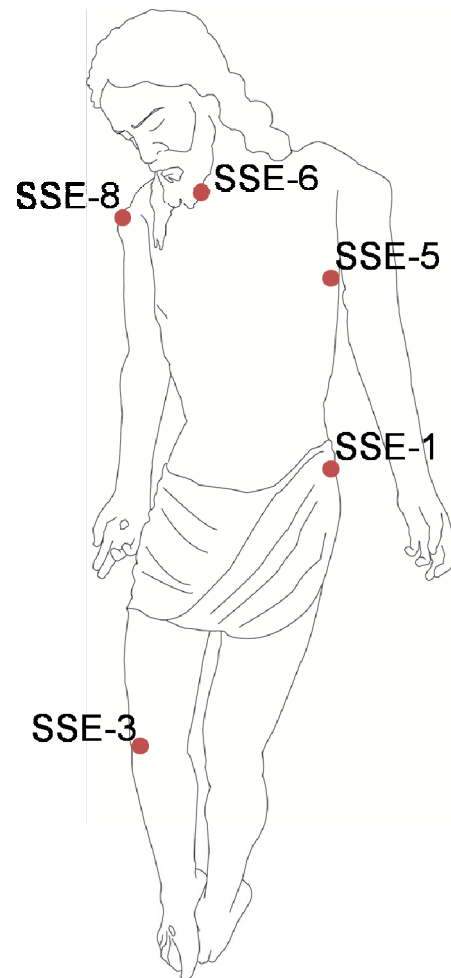

**Figure S2.** Sampling scheme.

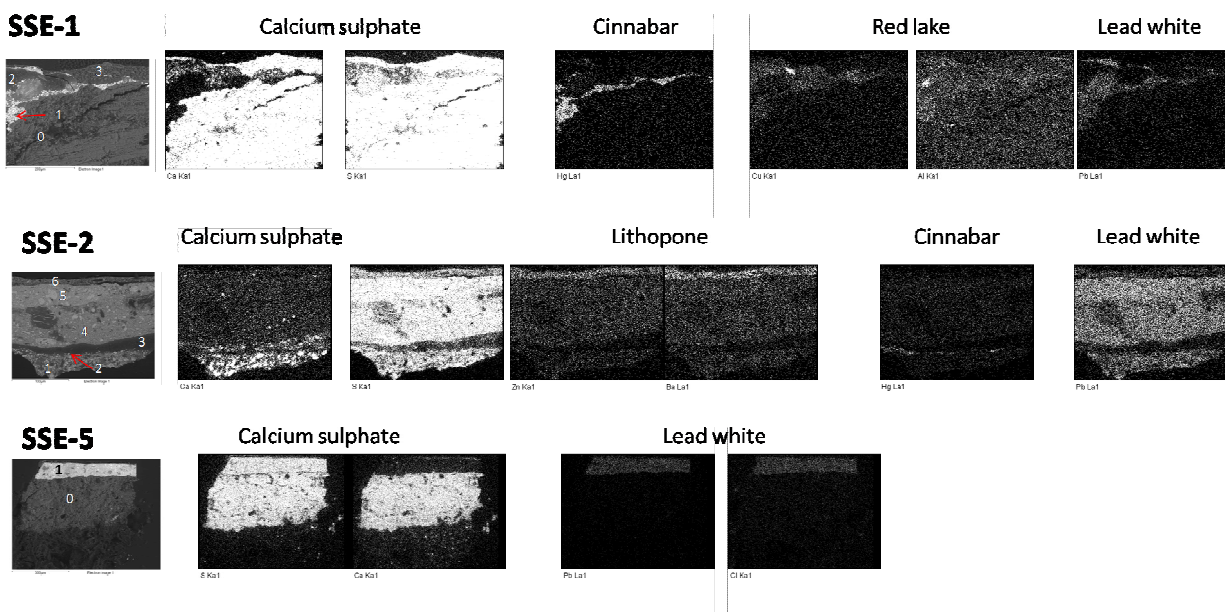

**Figure S3.** Chemical maps obtained with SEM-EDX of samples SSE-1, SSE-2, and SSE-5.
