# Supplementary material
Source: MDPI journal article supplement (https://www.mdpi.com/2571-9408/4/3/85)
Supplement: s1 [file s1]

Archive with 1 entries (1 files):
- heritage-1292693-supplementary.pdf
